# Supplementary material for: High-fat diet and estrogen modulate the gut microbiota in a sex-dependent manner in mice
Source: PubMed Central journal article supplement (PMC9829864; doi:10.1038/s42003-022-04406-5), 2023-01-09
Supplement: 42003_2022_4406_MOESM2_ESM.pdf [file 42003_2022_4406_MOESM2_ESM.pdf]

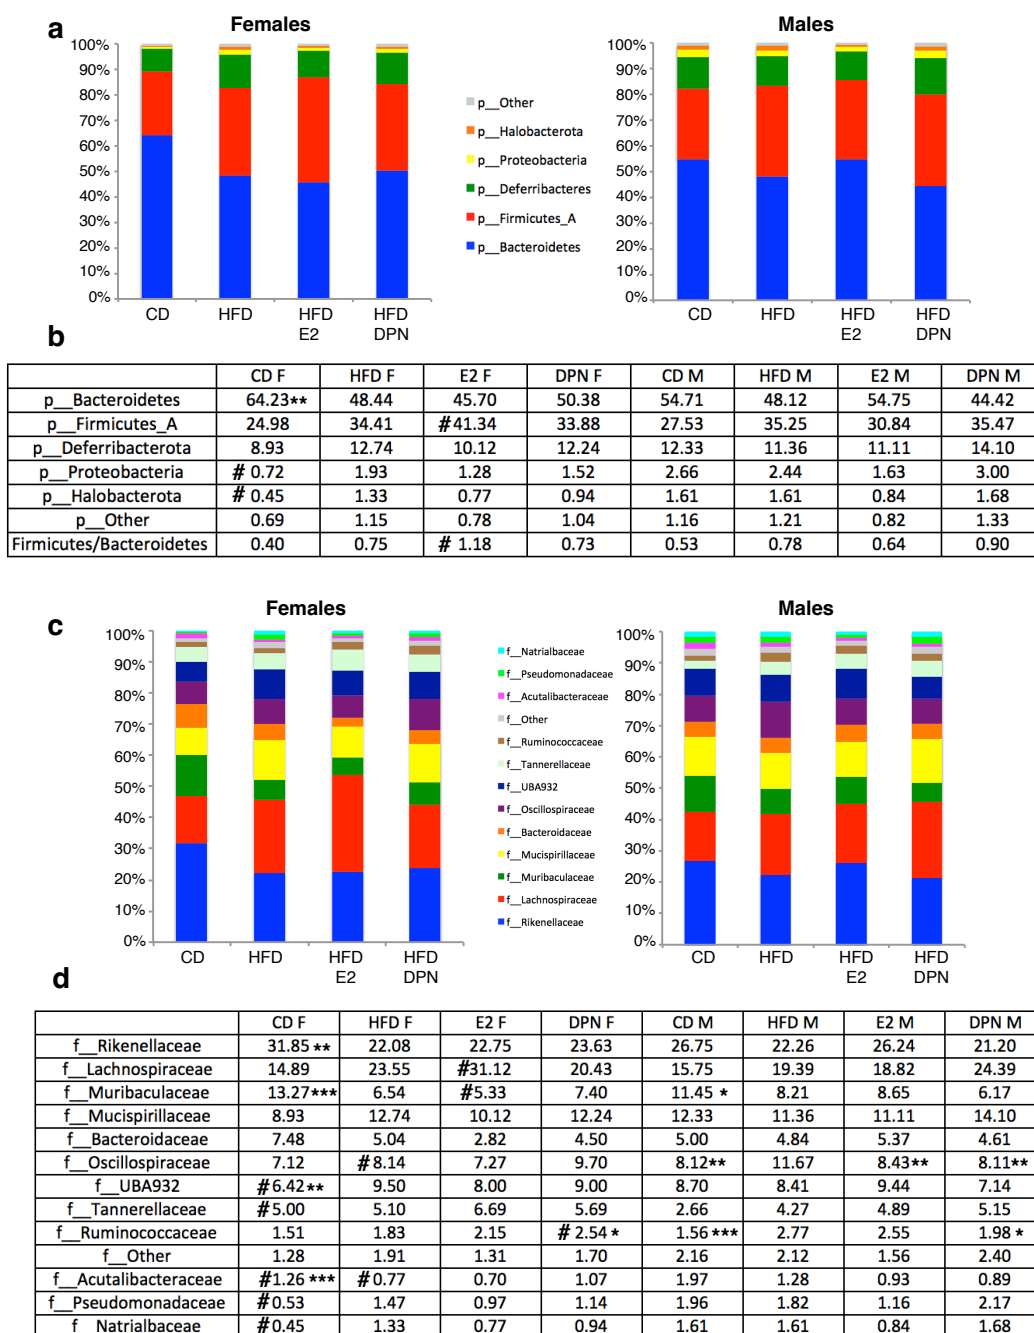

**Supplementary Figure 1: Effect of sex, HFD, and estrogenic ligands on the abundance of different phyla and families.** (a) Taxonomy plots of the relative abundance of the most abundant phyla in both females and males, along with (b) corresponding statistics. (c) Taxonomy plots of the relative abundance of the most abundant families in both females and males, along with (d) corresponding statistics. One-way ANOVA with uncorrected Fisher's Least Significant Difference (LSD) test was used. \*Indicates significant difference compared to HFD + vehicle,  $p < 0.05$ ; \*\*  $p < 0.01$ ; \*\*\*  $p < 0.001$ . # Indicates significant sex difference. N=64 (n=8, per group).

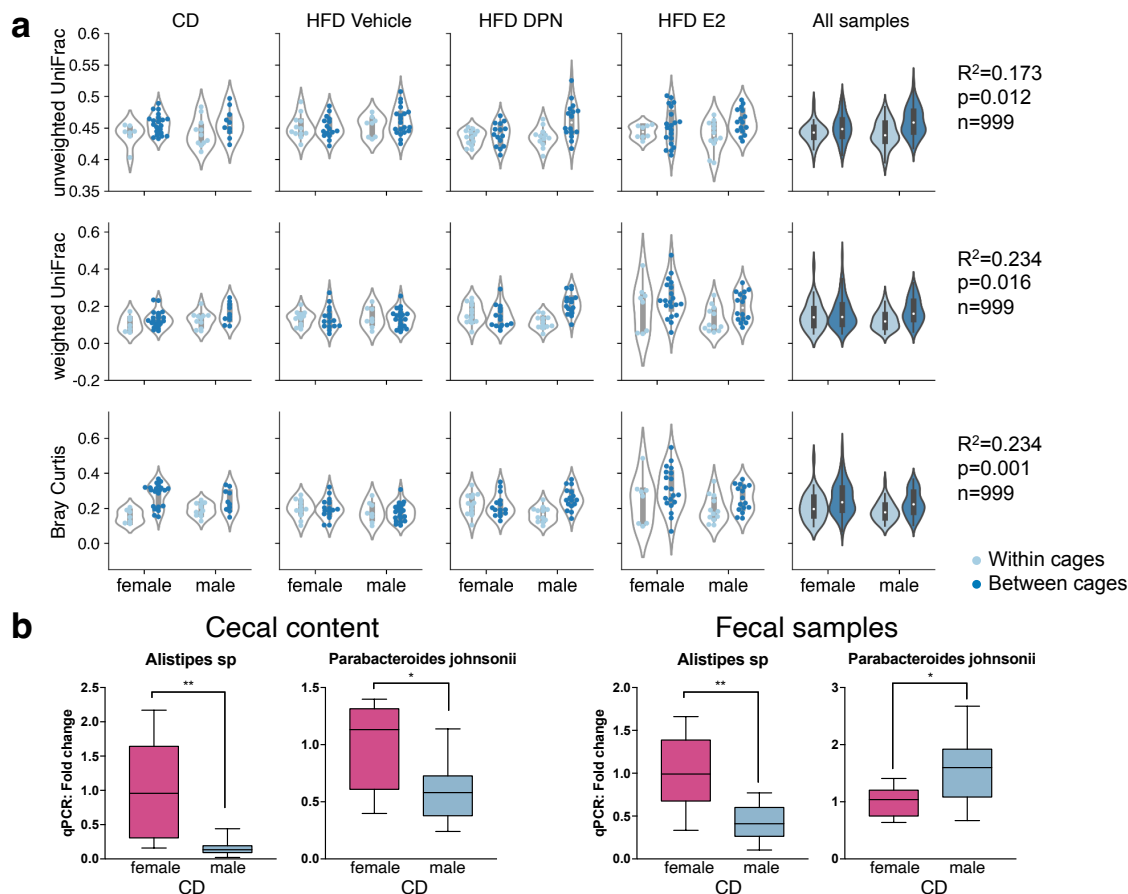

**Supplementary Figure 2: Mice in the same cage are more similar to each other (within cage effect) compared to mice in other cages (between cage effect) of the same sex and undergoing the same treatment. (a)** Violin plots show the dissimilarity of microbiomes of mice in the same cage (left, light blue) compared to between cages (right, blue). A higher value indicates a greater dissimilarity between the animals. This is shown for all three metrics: unweighted UniFrac (top), weighted UniFrac (middle), and Bray-Curtis distance for both females and males.  $N=64$  ( $n=8$  per group, except males CD  $n=7$ ). **(b)** qPCR analysis demonstrating sex differences in the abundance of *Alistipes sp* and *Parabacteroides johnsonii* during CD, in both cecal ( $n=11$  females,  $n=9$  males) and fecal samples ( $n=10$  per sex). The boxplots are shown as median (line), interquartile range (box), and minimum to maximum data range (whisker). Student's two-tailed t-test, \*  $p < 0.05$ ; \*\*  $p < 0.01$ .

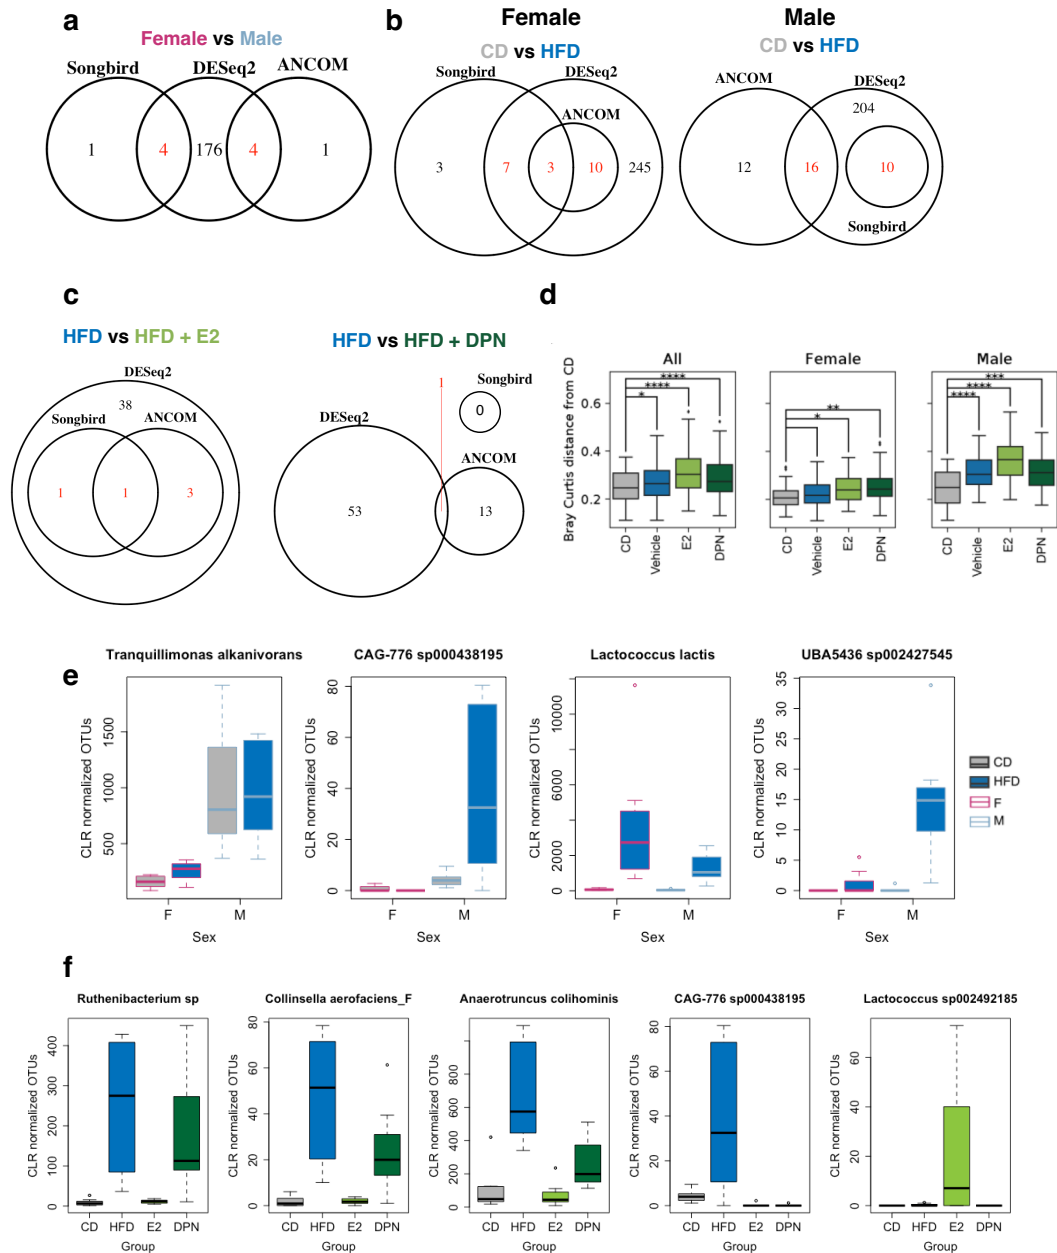

**Supplementary Figure 3: DESeq2 and ANCOM-II identify additional significantly altered species.** Venn diagram showing the number and overlap of differentially expressed species generated by Songbird, DESeq2, and ANCOM-II between (a) sexes, (b) diet (HFD), and (c) estrogenic ligand treatment in males (E2 and DPN). (d) Boxplot showing the Bray-Curtis distance from CD. (e) Boxplots of centered log-ratio (CLR) normalized operational taxonomic unit (OTU) counts for the four additional differentially abundant species between the sexes identified with both DESeq2 and ANCOM-II. (f) Boxplots of CLR normalized OTU counts for the differentially abundant species upon ligands treatments in males. N=64 (n=8 per group, except males CD n=7). The boxplots are shown as median (line), interquartile range (box), and minimum to maximum data range (whisker). \*FDR<0.05; \*\*FDR<0.01; \*\*\*FDR<0.001; \*\*\*\* FDR<0.0001 (Benjamini-Hochberg-adjusted p-value).

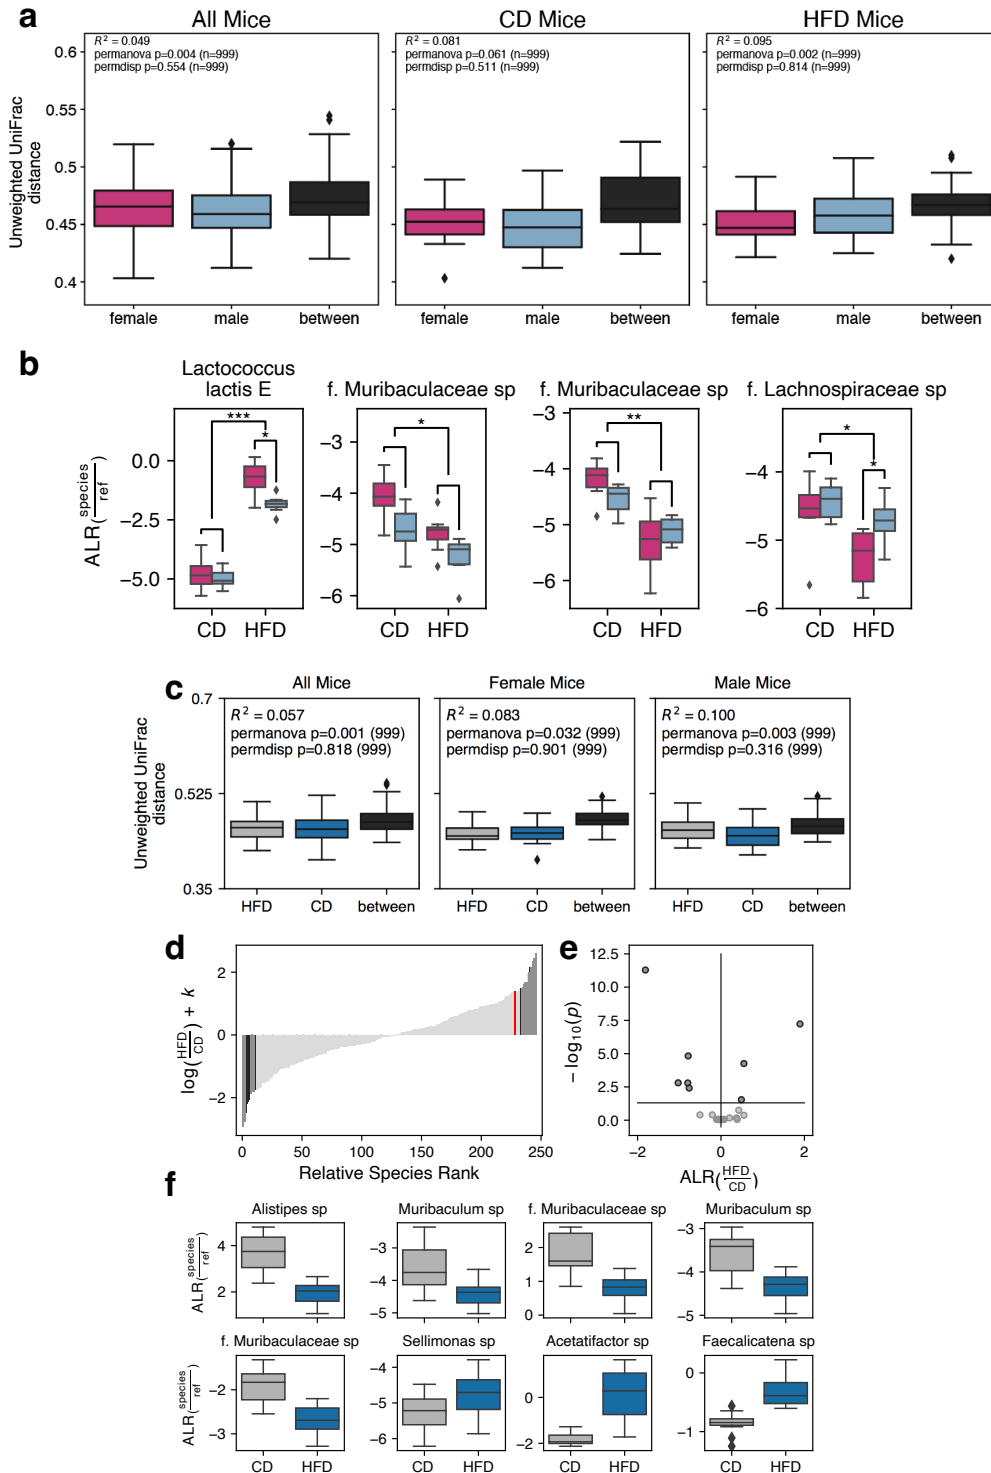

**Supplementary Figure 4: Significant sex differences during HFD identified using a sex interaction model. (a)** Boxplots presenting the beta diversity per sex, with unweighted UniFrac distance. **(b)** Boxplot of the additive-log-ratio (ALR) transformed taxa showing the significantly altered species upon HFD with a sex-interaction model. **(c)** Boxplots presenting the beta diversity per diet, with unweighted UniFrac distance. **(d)** Histogram plotting the species rank against the log fold change difference between CD and HFD, both sexes combined. **(e)** Volcano plot showing the significantly altered species (HFD vs CD), both sexes combined. **(f)** Boxplot of the ALR-transformed taxa showing the species significantly altered by HFD, both sexes combined. N=64 (n=8 per group, except males CD n=7). The boxplots are shown as median (line), interquartile range (box), and minimum to maximum data range (whisker). \*FDR<0.05; \*\*FDR<0.01; \*\*\*FDR<0.001 (Benjamini-Hochberg-adjusted p-value).

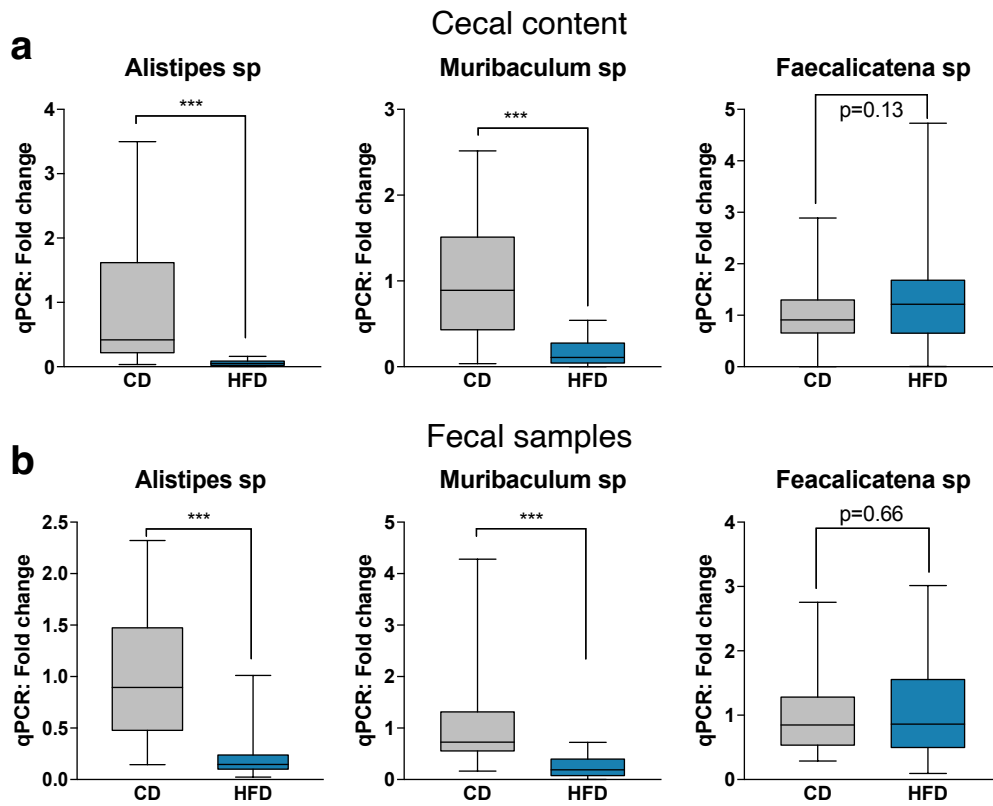

**Supplementary Figure 5: HFD-induced changes in the cecal microbiome confirmed by qPCR in cecal and fecal samples.** qPCR confirmation of HFD-induced changes identified by WGS (cecal microbiome) for *Alistipes* sp, *Muribaculum* and *Faecalicatena* genera in **(a)** cecal content (n=20 CD, n=24 HFD, sexes combined) and **(b)** fecal samples (n=20 CD, n=24 HFD, sexes combined). The boxplots are shown as median (line), interquartile range (box), and minimum to maximum data range (whisker). Two-tailed Student's t-test, \*\*\*  $p < 0.001$ .

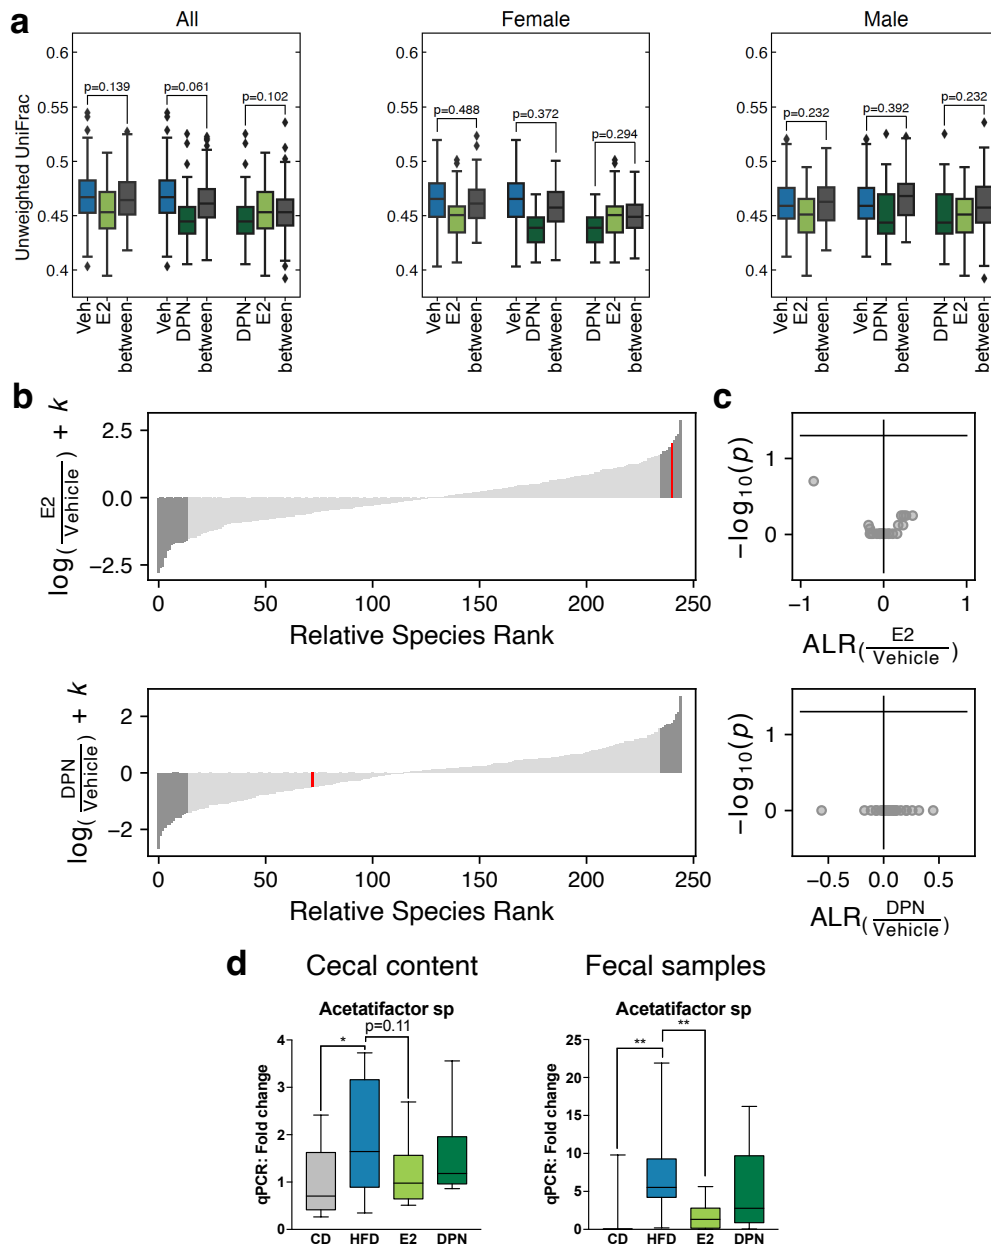

**Supplementary Figure 6: Estrogenic treatment does not have a significant impact on the cecal microbiome when the sexes are combined.** (a) Boxplots showing the unweighted UniFrac distance between vehicle, E2, and DPN treatment in sexes combined (left) and separated (right), during HFD. (b) Histogram plots of the species rank against the log fold change difference (E2 vs vehicle, and DPN vs vehicle), adjusted for sex. (c) Volcano plot showing the significant differentially abundant species (E2 vs vehicle, and DPN vs vehicle), adjusted for sex. (d) qPCR confirmation of E2 regulation of *Acetatifactor sp* in cecal and fecal samples, in males (n=9 for CD, n=14 for HFD, n=8 for E2, and n=8 for DPN, with two outliers identified and removed for both E2 and DPN treatments). The boxplots are shown as median (line), interquartile range (box), and minimum to maximum data range (whisker). Student's two-tailed t-test, \* $p < 0.05$ ; \*\* $p < 0.01$ .

| Songbird / DESeq2 / ANCOM-II | Songbird / DESeq2                  | DESeq2 / ANCOM-II               |
|------------------------------|------------------------------------|---------------------------------|
| s__Turicibacter sp002311155  | s__CAG-873 sp002490635             | s__Lactococcus lactis_E         |
| s__Brachyspira hamptonii_B   | s__Muribaculum sp002358615         | s__Alistipes sp002428825        |
| s__CAG-552 sp000435495       | s__UBA7597 sp002474405             | s__Helicobacter_D sp002297555   |
|                              | s__CAG-115 sp002492075             | s__Enterococcus_B durans        |
|                              | s__Ruthenibacterium lactatiformans | s__Turicibacter sp002493395     |
|                              | s__Eubacterium_E sp900016875       | s__Ruthenibacterium sp003149955 |
|                              | s__Blautia sp000432195             | s__Turicibacter sanguinis       |
|                              |                                    | s__NK4A144 sp000622025          |
|                              |                                    | s__Phoenicibacter massiliensis  |
|                              |                                    | s__CAG-269 sp000437215          |

**Supplementary Table 1:** Species identified as differentially abundant upon diet (CD vs HFD) in females with at least two methods (DESeq2, Songbird, and/or ANCOM-II).

| Songbird / DESeq2                  | ANCOM-II / DESeq2              |
|------------------------------------|--------------------------------|
| s__Turicibacter sp002311155        | s__Lactococcus lactis_E        |
| s__ER4 sp000765235                 | s__Acetatifactor sp002490995   |
| s__Ruthenibacterium sp002315015    | s__UBA7173 sp001689685         |
| s__Collinsella aerofaciens_F       | s__Muribaculum sp002492595     |
| s__Brachyspira hamptonii_B         | s__CAG-475 sp900322215         |
| s__NK3B98 sp000421005              | s__Dorea sp002492335           |
| s__CAG-110 sp002372735             | s__Streptococcus orisratti     |
| s__Agathobaculum butyriciproducens | s__Megasphaera sp900066485     |
| s__CAG-485 sp002491165             | s__Phoenicibacter massiliensis |
| s__UBA7597 sp002474405             | s__UBA3206 sp002363705         |
|                                    | s__Enterococcus_B durans       |
|                                    | s__UBA5436 sp002427545         |
|                                    | s__CAG-1138 sp000434675        |
|                                    | s__UBA2897 sp002350105         |
|                                    | s__Turicibacter sp002493395    |
|                                    | s__Turicibacter sanguinis      |

**Supplementary Table 2:** Species identified as differentially abundant upon diet (CD vs HFD) in males, with two methods (DESeq2 and Songbird or ANCOM-II)

| Diet/Treatment | Female |      | Male   |      |
|----------------|--------|------|--------|------|
|                | BW (g) | SEM  | BW (g) | SEM  |
| CD             | 22.19  | 0.63 | 29.89  | 1.20 |
| HFD/Veh        | 30.54  | 1.24 | 43.58  | 0.73 |
| HFD/E2         | 29.82  | 1.23 | 45.19  | 0.94 |
| HFD/DPN        | 31.89  | 1.21 | 41.85  | 1.99 |

**Supplementary Table 3:** Average body weight per group (N=64, n=8 per group) at end of the experiment.

| Primer                    | FW primer (5'-3')        | RV primer (5'-3')      |
|---------------------------|--------------------------|------------------------|
| Acetatifactor sp002490995 | AATACGCGCAGGAGTATGGG     | GGTTGCCGTGAAAAGAACCC   |
| Alistipes sp002428825     | GGGTTGCACGAGGTTCTTTC     | GTTCGTTTCTCTGTGGGAGC   |
| Faecalicatena genus       | GGCGTGCTTAACACATGCAA     | CCGCTCAGTCACAACACTCT   |
| Muribaculum genus         | AGGGTGTAGCTCTACGGAGT     | ACTTAAGCCGACACCTCACG   |
| Parabacteroides johnsonii | GTAGTCAGACCGACCTTGAAAGAG | CTTAAGCCGACACCTCACGG   |
| Total bacteria            | CGGCAACGAGCGCAACCC       | CCATTGTAGCACGTGTGTAGCC |

**Supplementary Table 4:** Primer sequences
